# Supplementary material
Source: PubMed Central journal article supplement (PMC4542386)
Supplement: JVI.01072-15_zjv999090744so1.pdf [file JVI.01072-15_zjv999090744so1.pdf]

TABLE S1: Proteins showing ERK1 Primed GSK-3 $\beta$  Phosphorylation\*

|           |           |          |          |
|-----------|-----------|----------|----------|
| ABL2      | EYA1      | LIMD1    | RBPMS    |
| AFF4      | EYA4      | LOC51035 | Rkhd2    |
| AIPL1     | FLJ20105  | MAGEA4   | RNUT1    |
| ANKS1     | FMNL2     | MAGEA9   | RPA2     |
| ard       | FOSL1     | MAGEB6   | SAFB2    |
| ASPSCR1   | FOSL2     | MAGED1   | SART3    |
| ATF1      | FOXP4     | MBNL3    | SF3B4    |
| ATF6      | FUBP1     | MEF2C    | SIAHBP1  |
| BCL11A    | GMEB1     | MEOX1    | SLX5     |
| BCOR      | HCLS1     | MGC10334 | SMAD4    |
| BTBD12    | HIP2      | MGC20255 | SOX9     |
| C14orf106 | HIRIP3    | MGC27016 | SP192    |
| C19orf21  | HOXD3     | MGC4614  | SPF45    |
| C20orf19  | HPCA      | MGC5395  | SRA1     |
| C21orf66  | HSA272196 | NAP1L5   | SSBP2    |
| C5orf16   | HSF1      | NFATC1   | SSBP4    |
| CARHSP1   | HSRNAFEV  | NFATC3   | SUHW4    |
| CBFA2T3   | ID1       | NFATC4   | TBC1D22A |
| CC2D1A    | IL17B     | NUP133   | TBX20    |
| CENTG1    | MAPK1     | NUP35    | TCEAL6   |
| CHAF1B    | PECI      | PCBD1    | TEAD3    |
| CITED1    | HSPA2     | PCTK3    | TFPT     |
| CNOT2     | MPP1      | PER1     | TRIM16   |
| CRK       | UBE2N     | PHF1     | TRIM26   |
| CSL4      | ANXA2     | PIPPIN   | TRIP10   |
| CSRP3     | GSN       | PITX1    | TSC22D3  |
| CSTF2T    | GDI2      | PKNOX1   | UPLC1    |
| CTTN      | STUB1     | POLRID   | USF2     |
| DAZAP1    | ZXDC      | PPP1R13L | WHSC2    |
| DCP1A     | IOH6695   | PQBP1    | Zfp185   |
| E2F7      | PRDX1     | PSMC3    | ZHX1     |
| EEF1B2    | CKM       | PTTG1    | ZNF261   |
| EIF3S4    | SCP2      | PYGO2    | ZNF306   |
| EIF4B     | JMJD2D    | RAD23B   | ZNF397   |
| ELK1      | KIAA1442  | RBM12    | ZNF503   |
| EP400     | KLF4      | RBM5     | ZNF655   |
| ERF       | KIG1      | RBM9     | ZYX      |

\*Proteins showing 2-fold or greater signal intensity after ERK1 primed GSK-3 phosphorylation and not detected on the control array incubated with [ $\gamma$ ]<sup>32</sup>P-ATP alone or the array detecting residual ERK1 activity.

TABLE S2. Mapped phosphorylation sites

|                                                        |                     |
|--------------------------------------------------------|---------------------|
| AFF4                                                   |                     |
| HGSEHSK <u>S</u> RS <u>S</u> SPGK                      | S176/S180           |
| BCOR                                                   |                     |
| TALLP <u>P</u> SPR <u>P</u> SPRV                       | S336/S340           |
| C20orf19                                               |                     |
| EVEEKRA <u>S</u> PPV <u>S</u> PIP                      | S214/S218           |
| CARHSP1                                                |                     |
| GLLTPR <u>S</u> PER <u>S</u> PSP                       | S26/S30             |
| CC2D1A                                                 |                     |
| IGKGPAST <u>T</u> PTY <u>S</u> PAP                     | T204/S208           |
| CNOT2                                                  |                     |
| RTNSM <u>S</u> SS <u>G</u> LG <u>S</u> PNR             | S161/S165           |
| DCP1A                                                  |                     |
| ERNQM <u>G</u> D <u>S</u> NI <u>S</u> SPGL             | S176/S180           |
| PTYTIPL <u>S</u> PVL <u>S</u> P <u>T</u> L             | S315/S319           |
| EIF3S4                                                 |                     |
| LKGIPLAT <u>T</u> GDT <u>S</u> PEP                     | T38/S42             |
| EIF4B                                                  |                     |
| ARSQSSD <u>T</u> EQQ <u>S</u> PTS                      | T500/S504           |
| ERF                                                    |                     |
| RFPPSTP <u>S</u> EVL <u>S</u> PTE                      | S150/S154           |
| FMNL2                                                  |                     |
| IEDLHRG <u>S</u> NLP <u>S</u> PVG                      | S179/S183           |
| FOSL2                                                  |                     |
| MSNPYPR <u>S</u> HPY <u>S</u> PLP                      | S79/S83             |
| FOXP4                                                  |                     |
| QFLQQA <u>S</u> GL <u>S</u> SPGN                       | S82/S86             |
| HIRIP3                                                 |                     |
| NSESESG <u>S</u> EAS <u>S</u> PDY                      | S104/S108           |
| *HSF1                                                  |                     |
| RVKEEPP <u>S</u> PQ <u>S</u> PRV                       | S303/S307           |
| *NFATC3                                                |                     |
| AARFTLG <u>S</u> P <u>L</u> T <u>S</u> PGG <u>S</u>    | S207/S211/S215      |
| VCYAGSL <u>S</u> PH <u>H</u> SPV <u>S</u> PGH <u>S</u> | S288/S292/S296/S300 |
| *NFATC4                                                |                     |
| ASRFGLG <u>S</u> PL <u>P</u> SPR <u>R</u> AS <u>P</u>  | S213/S217/S221      |
| NUP133                                                 |                     |
| PKGLPLG <u>S</u> AV <u>S</u> SPVL                      | S41/S45             |
| PPP1R13L                                               |                     |
| DFLGRAG <u>S</u> PRG <u>S</u> PLA                      | S183/S187           |
| STUB1                                                  |                     |
| RLGAGGG <u>S</u> PEK <u>S</u> PSA                      | S19/S23             |
| TRIP10                                                 |                     |
| MNRAPSD <u>S</u> SLG <u>T</u> PSD                      | S298/T302           |
| SMAD4                                                  |                     |
| GSRTAPY <u>T</u> PNLPHHQ                               | T277                |
| CENTG1                                                 |                     |
| RNLARAL <u>S</u> TDCTPSG                               | S802                |

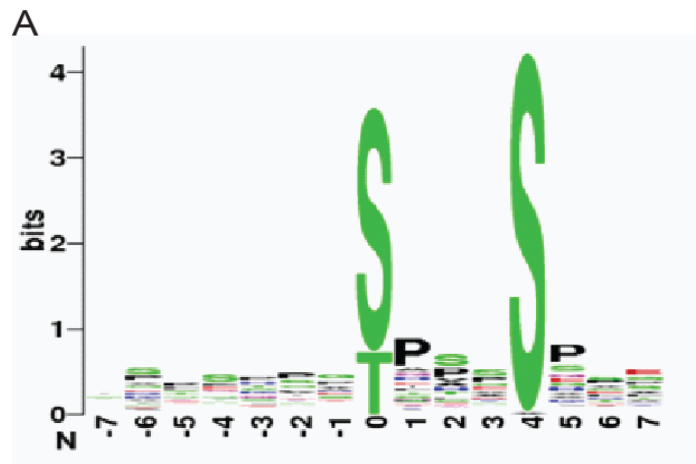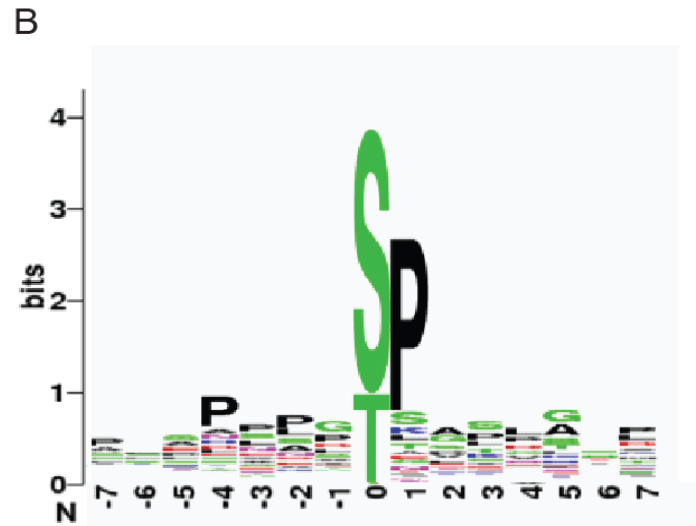

FIG. S1. Dominant LOGOs identified in the 148 potential ERK1 primed GSK-3 $\beta$  substrates.
